# Supplementary material for: MFG-E8 Reduces Aortic Intimal Proliferation in a Murine Model of Transplant Vasculopathy
Source: MDPI journal article supplement (doi:10.3390/ijms23084094), 2022-04-07
Supplement: s1 [file s1]

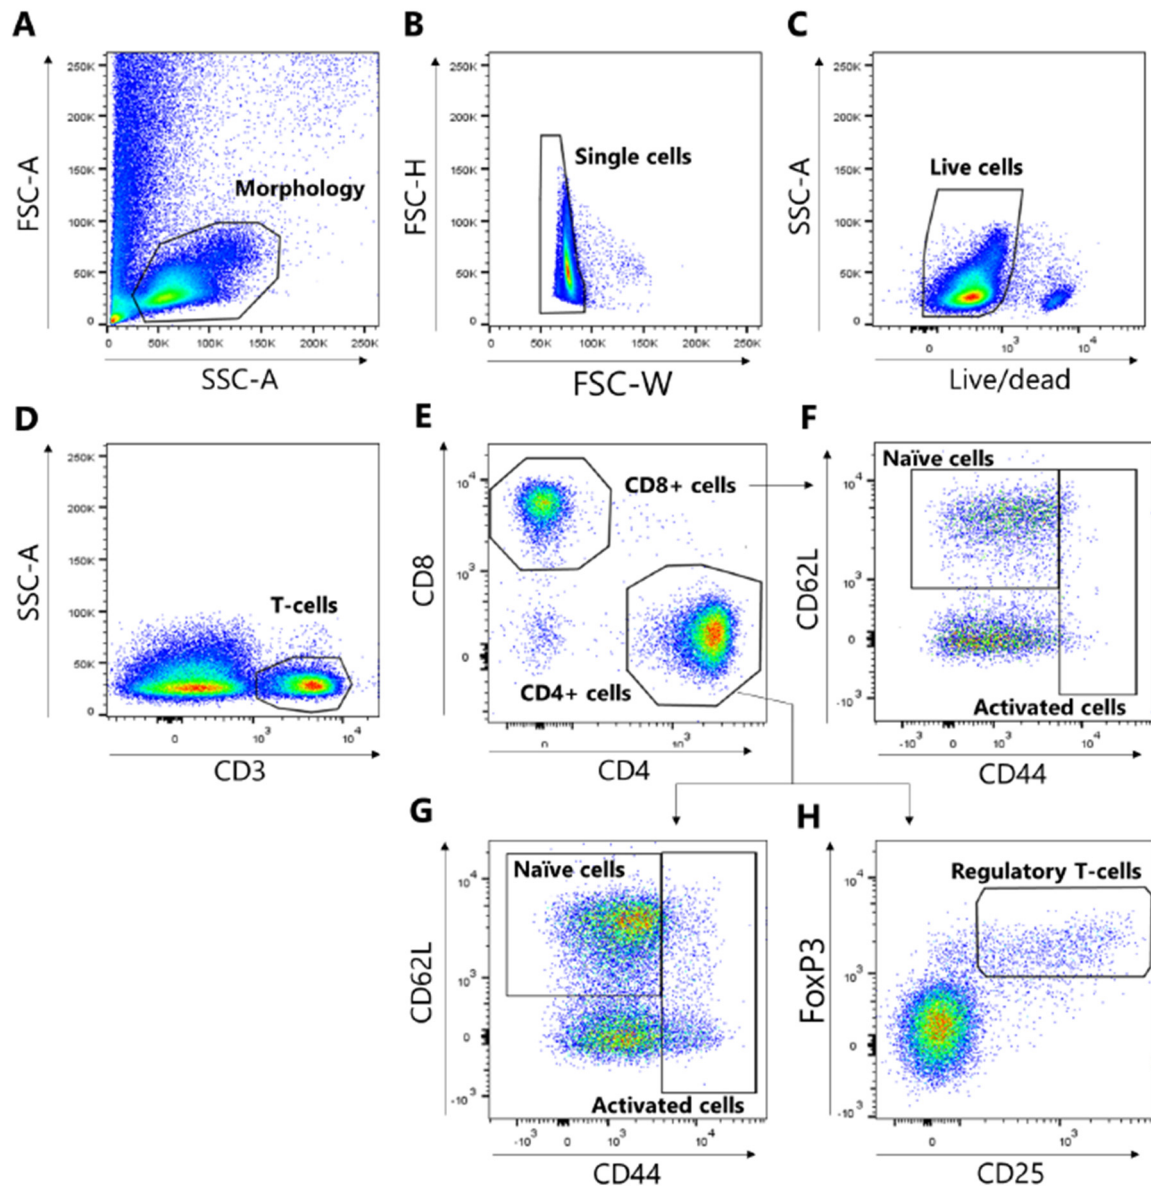

**Supplementary Figure S1.** Flow cytometry gating strategy to evaluate T-cell activation status. (A) Leukocytes were selected according to their morphology, (B) doublets were excluded, and (C) living cells were selected using a viability dye. (D) T cells (CD3<sup>+</sup> cells) were selected and (E) CD4<sup>+</sup> or CD8<sup>+</sup> cells were isolated. (F,G) Among them, naïve (CD62L<sup>+</sup>CD44<sup>-</sup>) or activated cells (CD44<sup>+</sup> cells) were gated. (H) From the CD3<sup>+</sup>CD4<sup>+</sup> cells, CD25<sup>+</sup>FoxP3<sup>+</sup> cells are regulatory T cells.

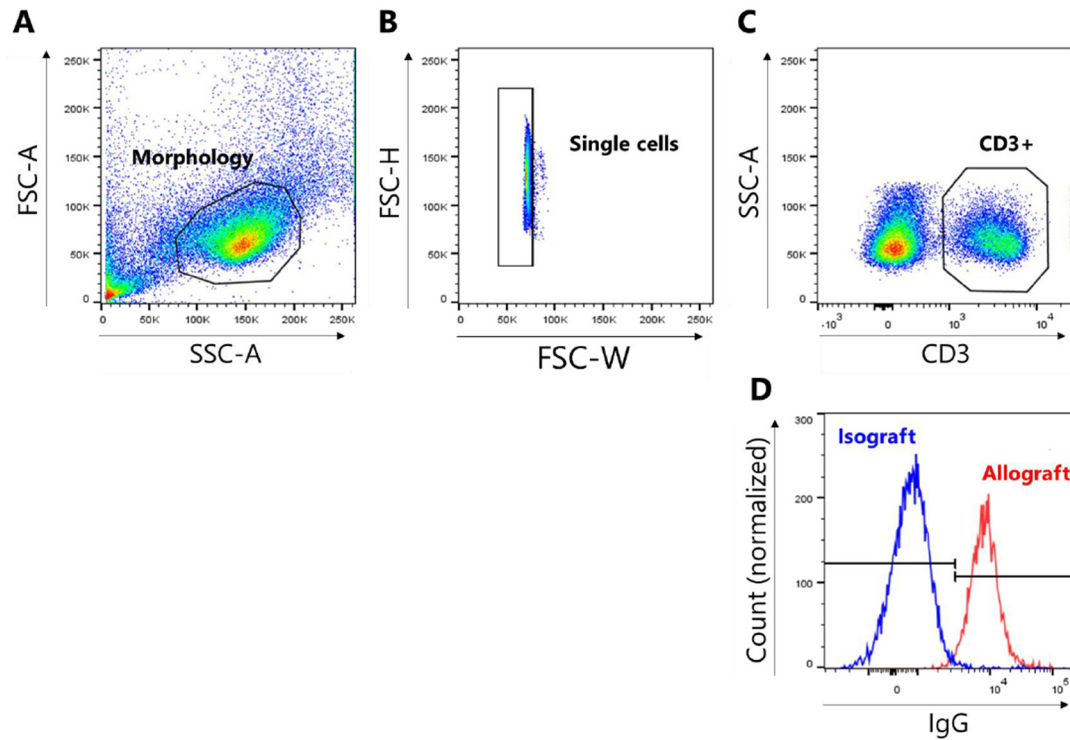

**Supplementary Figure S2.** Flow cytometry gating strategy to evaluate the presence of anti-donor antibodies. After selection of splenocytes (A) and single cells (B), IgG<sup>+</sup> cells (D) among CD3<sup>+</sup> cells (C) were considered positive for anti-donor antibodies.

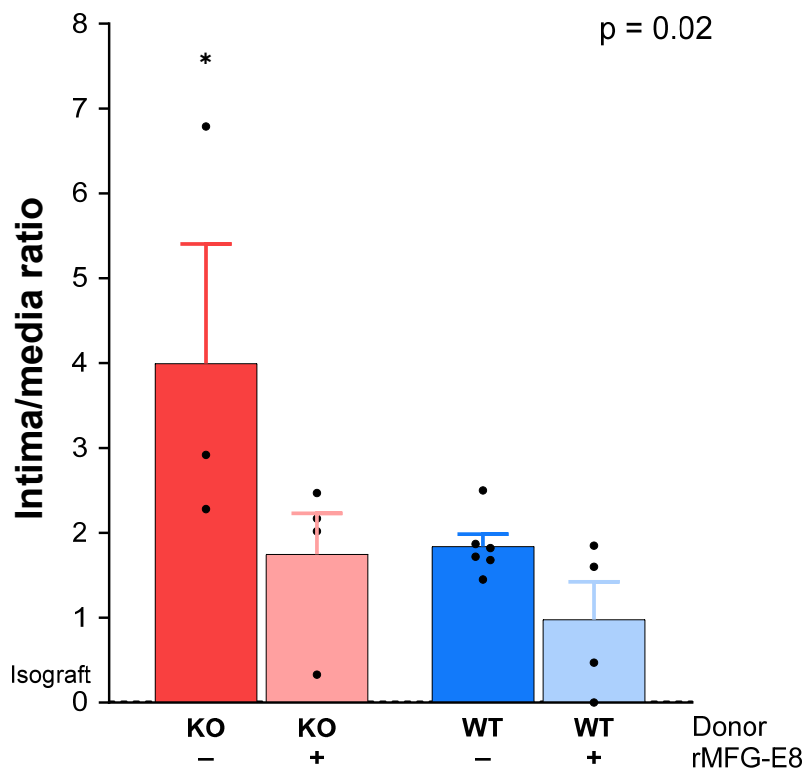

**Supplementary Figure S3.** Early effects of MFG-E8 on intimal proliferation. Intimal proliferation, assessed at 4 weeks following transplantation, was higher in mice receiving MFG-E8 KO aortas ( $p = 0.02$ ). One experiment,  $n = 5-6$  per group. \*  $p < 0.05$  between KO and WT + rMFG-E8 mice.

**A**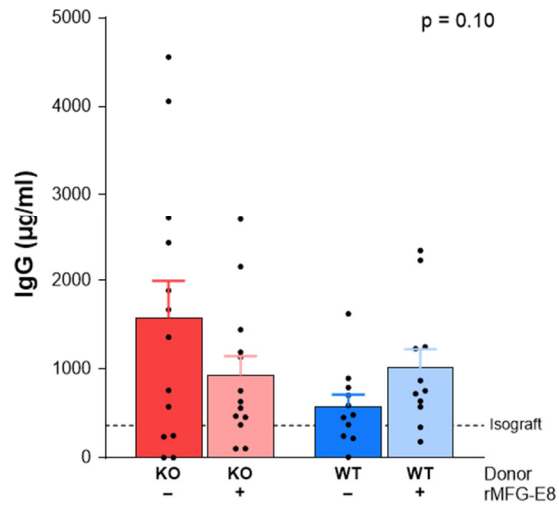**B**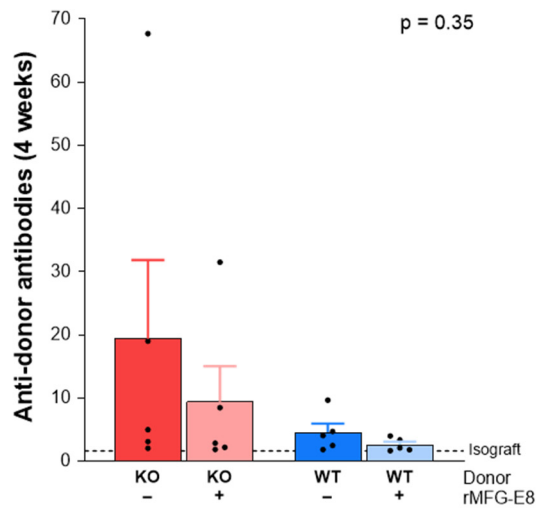**C**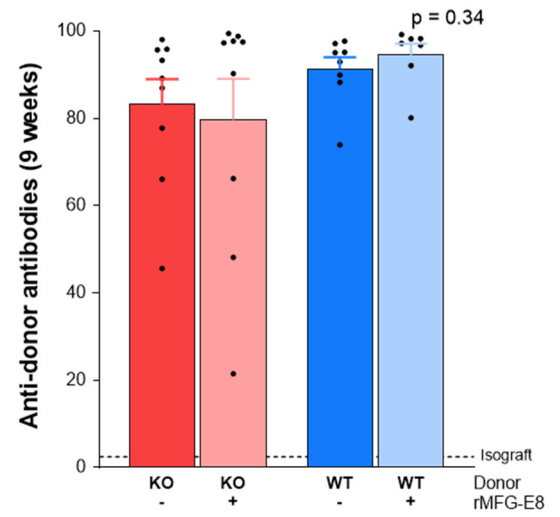

**Supplementary Figure S4.** Effect of MFG-E8 on cytokine and humoral response. (A) IgG in mice 9 weeks after transplantation. Anti-donor antibodies (ADAs) levels in mice 4 weeks (B) or 9 weeks (C) after transplantation. *p*-Value (upper corner) indicates overall ANOVA result.

**Supplementary Table S1. Immunofluorescence primary and secondary antibodies.**

|                                | <b>Primary antibody</b> | <b>Host</b> | <b>Provider</b> | <b>Secondary antibody</b> | <b>Provider</b>   |
|--------------------------------|-------------------------|-------------|-----------------|---------------------------|-------------------|
| <b>T-cell infiltration</b>     | CD4                     | Rat         | ThermoFisher    | anti-rat-AF488            | Life Technologies |
|                                | CD8 $\alpha$            | Mouse       | Santa-Cruz      | anti-mouse-AF594          | Life Technologies |
| <b>Macrophage infiltration</b> | Mac-2                   | Rat         | Biolegend       | anti-rat-AF488            | Life Technologies |
|                                | CD206                   | Rabbit      | Abcam           | anti-rabbit-AF647         | Life Technologies |

Mac-2 is a macrophage marker. CD206 is an M2 macrophage marker.

Abbreviations: n/a, not applicable; AF, Alexa Fluor; DAPI, 4',6-diamidino-2-phénylindole; CD, cluster of differentiation.

**Supplementary Table S2. Flow cytometry antibodies.**

| <b>Target</b>    | <b>Fluorochrome</b> | <b>Clone</b> | <b>Provider</b> |
|------------------|---------------------|--------------|-----------------|
| <b>CD3</b>       | PerCP-Cy5.5         | 145-2C11     | BD Biosciences  |
| <b>CD4</b>       | BUV395              | GK1.5        | BD Biosciences  |
| <b>CD8</b>       | V450                | 53-6.7       | BD Biosciences  |
| <b>CD44</b>      | PECy7               | IM7          | BD Biosciences  |
| <b>CD62L</b>     | APC-R700            | MEL-14       | BD Biosciences  |
| <b>CD25</b>      | APC                 | PC61         | BD Biosciences  |
| <b>FoxP3</b>     | PE                  | FJK-16s      | eBioscience*    |
| <b>Live/dead</b> | Aqua                | n/a          | ThermoFisher    |

Abbreviations: CD, cluster of differentiation; n/a, not applicable.

\* FoxP3/Transcription factor staining buffer set, eBioscience.
